# Supplementary material
Source: publisher figshare collection journal article supplement (https://karger.figshare.com/ndownloader/files/14568947)
Supplement: Supplementary file 1 [file 14568947]

Supplementary Table 2. Neurocognitive examination results

| **Examination Element** | **Results** |
| --- | --- |
| Correctly spelled “world” | Normal: 14 (48%) |
| Mean phonemic verbal fluency score in 1 minute | 1.9 ± 2.9 (range:0-9) |
| Mean number of gestures copied (0-4) | 0.9 ± 1.4 (range:0-4) |
| Mean digit span (0-6) | 2.2 ± 2.3 (range:0-6) |
| Mean naming score (0-15) | 5.1 ± 6.4 (range:0-15) |
| Correctly performed 3-step Luria task | 3 (10%) |
| Able to correctly interpret proverbs | 9 (31%) |
| Correctly performed praxis task | 7 (24%) |
| Read phrase correctly | 10 (37%) |
| Eye movements*  Normal  Vertical gaze restriction  Nystagmus  Untestable (unable to comply)  Untestable for technological reasons | 11 (38%)  4 (14%)  3 (10%)  11 (38%)  1 (3%) |
| Ptosis  None  Indeterminate | 27 (93%)  2 (7%) |
| Facial symmetry  Symmetric  Indeterminate | 27 (93%)  2 (7%) |
| Dysarthria  Present  Absent  Untestable | 10 (34%)  8 (28%)  11 (38%) |
| Proximal upper extremity strength  Normal  Abnormal unilateral  Abnormal bilateral  Untestable | 13 (45%)  1 (3%)  3 (10%)  12 (42%) |
| Distal upper extremity strength  Normal  Abnormal unilateral  Abnormal bilateral  Untestable | 12 (41%)  2 (7%)  2 (7%)  13 (45%) |
| Proximal lower extremity strength  Normal  Abnormal bilateral  Untestable (unable to comply)  Untestable for technological reasons | 9 (31%)  4 (14%)  14 (48%)  2 (7%) |
| Distal lower extremity strength  Normal  Abnormal unilateral  Abnormal bilateral  Untestable (unable to comply)  Untestable for technological reasons | 9 (31%)  1 (3%)  2 (7%)  15 (52%)  2 (7%) |
| Myoclonus  Absent  Present in 1 limb  Present >1 limb | 16 (55%)  1 (3%)  12 (42%) |
| Chorea  Absent  Present axial  Present appendicular  Untestable (unable to comply)  Untestable for technological reasons | 20 (69%)  3 (10%)  2 (7%)  3 (10%)  1 (4%) |
| Postural/Kinetic tremor  Absent  Slight, present with action  Moderate in amplitude (action)  Moderate in amplitude (postural and action)  Untestable (unable to comply)  Untestable for technological reasons | 12 (41%)  4 (14%)  6 (21%)  3 (10%)  2 (7%)  2 (7%) |
| Rapid alternating hand movements  Normal  Abnormal unilateral  Abnormal bilateral  Untestable (unable to comply)  Untestable for technological reasons | 6 (21%)  1 (3%)  2 (7%)  19 (66%)  1 (3%) |
| Heel to shin  Normal  Abnormal unilateral  Abnormal bilateral  Untestable (unable to comply)  Untestable for technological reasons | 5 (17%)  1 (3%)  2 (7%)  19 (66%)  2 (7%) |
| Sequential finger tapping  Intact bilaterally  Intact unilaterally  Untestable (unable to comply)  Untestable for technological reasons | 8 (27%)  2 (7%)  17 (59%)  2 (7%) |
| Standing with arms across chest  Normal  Needs assistance  Uses arms of chair  Untestable (unable to comply)  Untestable for technological reasons | 5 (17%)  6 (21%)  1 (3%)  16 (56%)  1 (3%) |
| Romberg sign  Absent  Present  Untestable (unable to comply)  Untestable for technological reasons | 7 (24%)  3 (10%)  18 (62%)  1 (4%) |
| Gait  Ataxic  Parkinsonian  Abnormal-other  Untestable (unable to comply)  Untestable for technological reasons | 5 (17%)  7 (24%)  4 (14%)  12 (41%)  1 (4%) |
| Overall cooperation  Satisfactory  Fluctuated  Not satisfactory | 12 (43%)  3 (10%)  14 (48%) |
| Overall attention  Satisfactory  Fluctuated  Not satisfactory | 12 (41%)  6 (21%)  11 (38%) |
| Ability to cope  Satisfactory  Fluctuated  Not satisfactory | 26 (90%)  1 (3%)  2 (7%) |
| Overall videoconference quality  Good  Fair  Poor | 5 (17%)  19 (66%)  5 (17%) |
| Testing interrupted  No  Yes, due to patient need  Yes, due to technological reasons | 10 (35%)  1 (3%)  18 (62%) |

* One case demonstrated vertical gaze restriction and nystagmus
